# Supplementary material
Source: HighWire-hosted journal article supplement (https://www.jneurosci.org/highwire/filestream/602072/field_highwire_adjunct_files/0/Supplemental_Material.pdf)
Supplement: Supplemental_Material.pdf [file Supplemental_Material.pdf]

## Maywood et al. Suppl. Figure S1.

### Decline of Per2-mediated bioluminescence in SCN slices treated with cycloheximide: effect of $CK1\epsilon^{Tau/Tau}$ is independent of $Fbx13^{Afh/Afh}$ .

Per2:Luc bioluminescence recordings from SCN slices treated with cycloheximide (CHX) at the peak of the bioluminescence cycle. Curves were normalised to 100% for initial reading. Note comparable accelerated decline, reflecting decreased Per2 stability, in  $CK1\epsilon^{Tau/Tau}$  slices with both  $Fbx13^{+/+}$  and  $Fbx13^{Afh/Afh}$  backgrounds.

Black = WT, Blue = Afh, Red = Tau, Green = Tau/Afh, (mean  $\pm$  SEM, n= 6-8 per genotype).

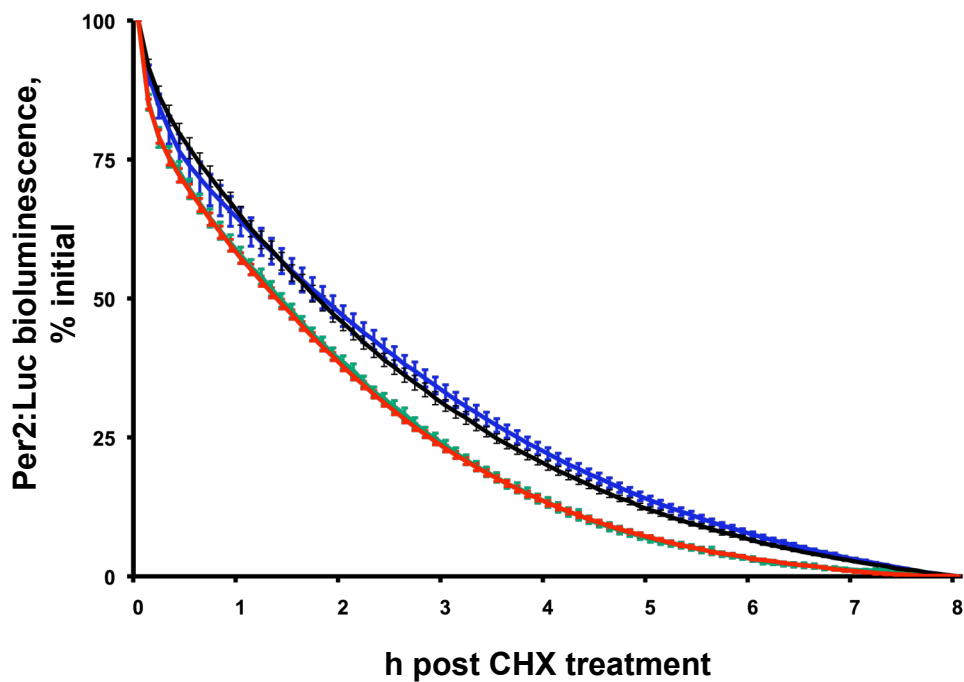

Maywood et al. Suppl. Figure S2.

Correlation between mean circadian periods of wheel-running activity and SCN bioluminescence rhythms in mice carrying single and combined *CK1 $\epsilon$ <sup>Tau</sup>* and *Fbxl3<sup>Afh</sup>* mutations.

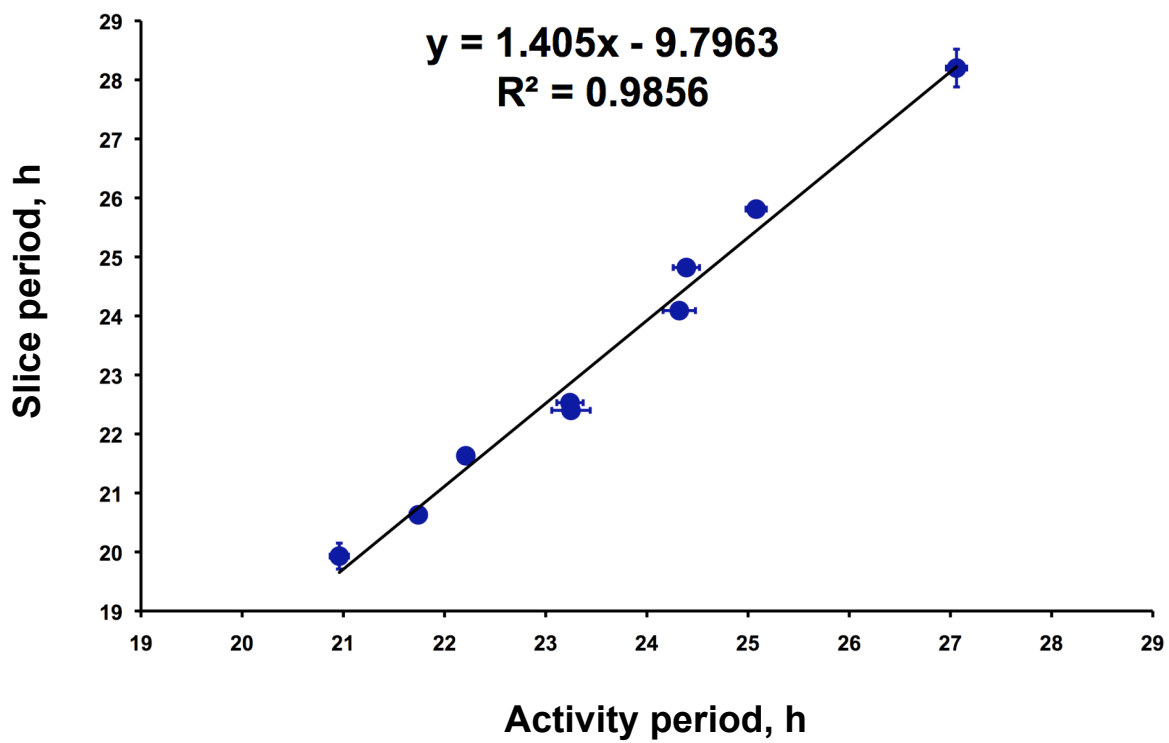

Maywood et al. Suppl. Figure S3.

Normalised plots of bioluminescence curves from wildtype (solid black), *Afh* homozygous (dashed black), *Tau* homozygous (solid grey) and double homozygous (dashed grey) SCN, aligned by nadir of bioluminescence. Curves represent mean ( $\pm$ SEM) of 5 slices per genotype.

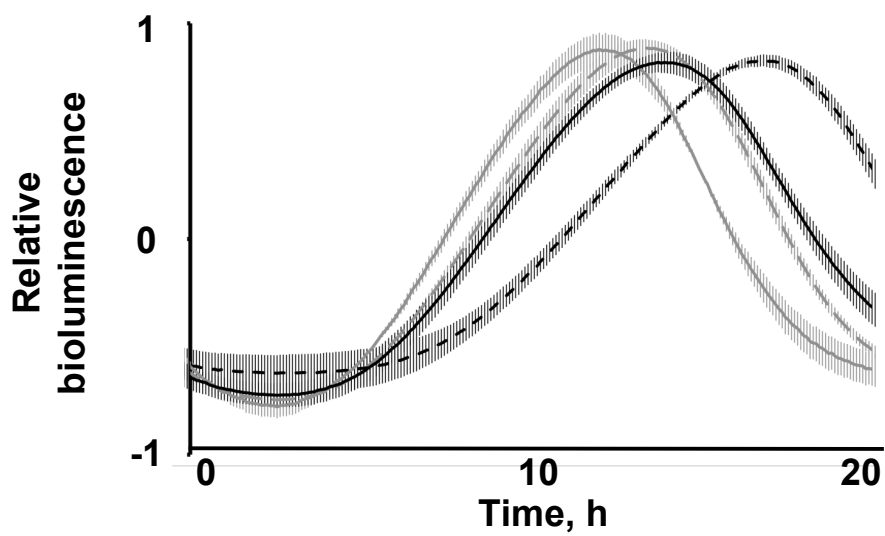

**Supplementary Table S1. Parameters of entrained and free-running circadian rhythm of wheel-running activity in wildtype and single and double mutant mice (Mean  $\pm$ SEM, (n))**

| Genotype                                            | Phase angle on LD, h  | Period in DD, h       | Periodogram Amplitude in DD |
|-----------------------------------------------------|-----------------------|-----------------------|-----------------------------|
| Fbxl3 <sup>+/+</sup> ::CSK1e <sup>+/+</sup>         | -0.17 $\pm$ 0.07 (11) | 24.32 $\pm$ 0.07 (11) | 1012 $\pm$ 140 (11)         |
| Fbxl3 <sup>+/+</sup> ::CSK1e <sup>Tau/+</sup>       | 0.33 $\pm$ 0.35 (6)   | 22.21 $\pm$ 0.09 (6)  | 1034 $\pm$ 212 (6)          |
| Fbxl3 <sup>+/+</sup> ::CSK1e <sup>Tau/Tau</sup>     | nd                    | 20.96 $\pm$ 0.22 (9)  | 798 $\pm$ 180 (9)           |
| Fbxl3 <sup>Afh/+</sup> ::CSK1e <sup>+/+</sup>       | -0.52 $\pm$ 0.10 (6)  | 25.08 $\pm$ 0.13 (6)  | 1282 $\pm$ 144 (6)          |
| Fbxl3 <sup>Afh/+</sup> ::CSK1e <sup>Tau/+</sup>     | -0.18 $\pm$ 0.05 (7)  | 23.24 $\pm$ 0.07 (7)  | 1247 $\pm$ 133 (7)          |
| Fbxl3 <sup>Afh/+</sup> ::CSK1e <sup>Tau/Tau</sup>   | 0.49 $\pm$ 0.37 (7)   | 21.74 $\pm$ 0.12 (7)  | 1359 $\pm$ 123 (7)          |
| Fbxl3 <sup>Afh/Afh</sup> ::CSK1e <sup>+/+</sup>     | -0.34 $\pm$ 0.10 (7)  | 27.06 $\pm$ 0.32 (7)  | 989 $\pm$ 186 (7)           |
| Fbxl3 <sup>Afh/Afh</sup> ::CSK1e <sup>Tau/+</sup>   | -0.22 $\pm$ 0.08 (6)  | 24.39 $\pm$ 0.11 (6)  | 1073 $\pm$ 114 (6)          |
| Fbxl3 <sup>Afh/Afh</sup> ::CSK1e <sup>Tau/Tau</sup> | -0.14 $\pm$ 0.03 (10) | 23.25 $\pm$ 0.10 (10) | 1047 $\pm$ 151 (10)         |

**Supplementary Table S2. Period, amplitude and relative amplitude error for regional bioluminescence rhythms in wildtype and double homozygous *Afh::Tau* mutant SCN slices (mean  $\pm$ SEM, n = 3 per genotype). DM lip = dorsomedial lip, the leading edge of the bioluminescent wave; DL core = dorsolateral core; core, lateral and ventral as stated.**

| Region  | Period, h        |                   | Amplitude, cps |                   | Relative amplitude error |                   |
|---------|------------------|-------------------|----------------|-------------------|--------------------------|-------------------|
|         | Wild-type        | Double homozygote | Wild-type      | Double homozygote | Wild-type                | Double homozygote |
| DM lip  | 24.19 $\pm$ 0.28 | 22.71 $\pm$ 0.14  | 714 $\pm$ 197  | 570 $\pm$ 242     | 0.083 $\pm$ 0.019        | 0.120 $\pm$ 0.023 |
| DL core | 24.32 $\pm$ 0.34 | 22.93 $\pm$ 0.15  | 1295 $\pm$ 421 | 1247 $\pm$ 437    | 0.081 $\pm$ 0.006        | 0.109 $\pm$ 0.012 |
| Core    | 24.33 $\pm$ 0.36 | 22.89 $\pm$ 0.15  | 1090 $\pm$ 272 | 1026 $\pm$ 300    | 0.086 $\pm$ 0.009        | 0.091 $\pm$ 0.006 |
| Lateral | 24.35 $\pm$ 0.38 | 22.91 $\pm$ 0.17  | 708 $\pm$ 266  | 598 $\pm$ 205     | 0.082 $\pm$ 0.007        | 0.090 $\pm$ 0.009 |
| Ventral | 24.17 $\pm$ 0.31 | 22.79 $\pm$ 0.12  | 511 $\pm$ 182  | 379 $\pm$ 165     | 0.080 $\pm$ 0.022        | 0.076 $\pm$ 0.008 |
